# Supplementary material for: Arap1 Deficiency Causes Photoreceptor Degeneration in Mice
Source: PubMed Central journal article supplement — Invest Ophthalmol Vis Sci. 2017 Mar;58(3):1709–18. doi: 10.1167/iovs.16-20062 (PMC5361582; doi:10.1167/iovs.16-20062), 2017-03
Supplement: iovs-58-01-29_s01.pdf [file iovs-58-01-29_s01.pdf]

S1A

### Retinal Ganglion Cell Layer Thickness

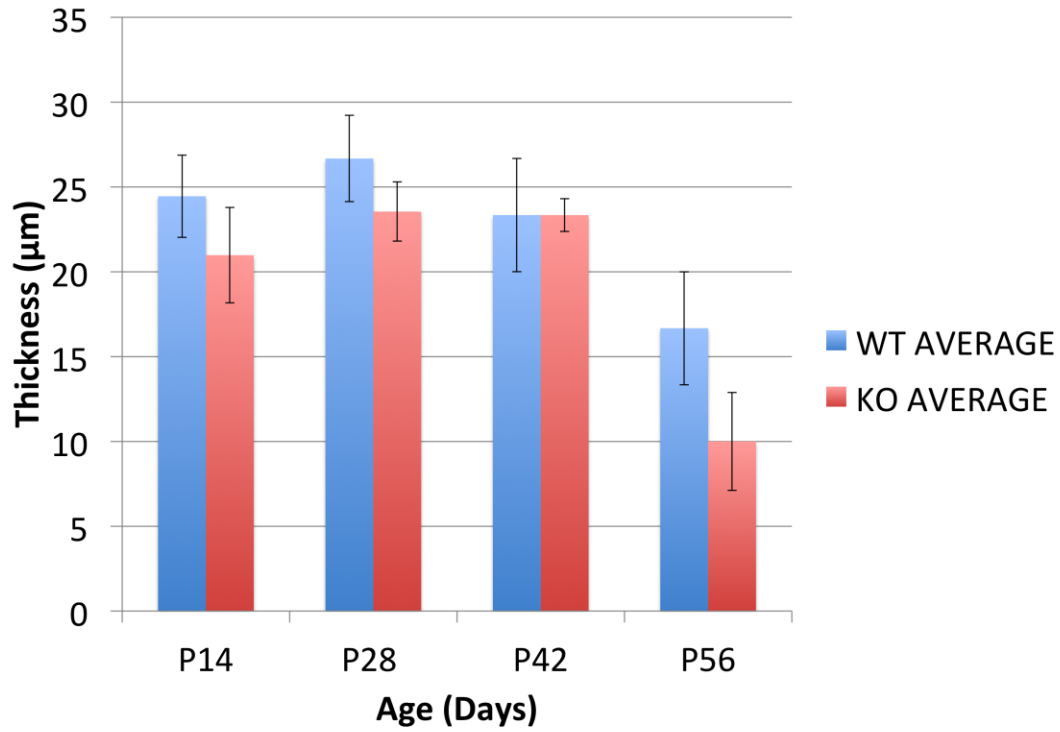

S1B

### Inner Plexiform Layer

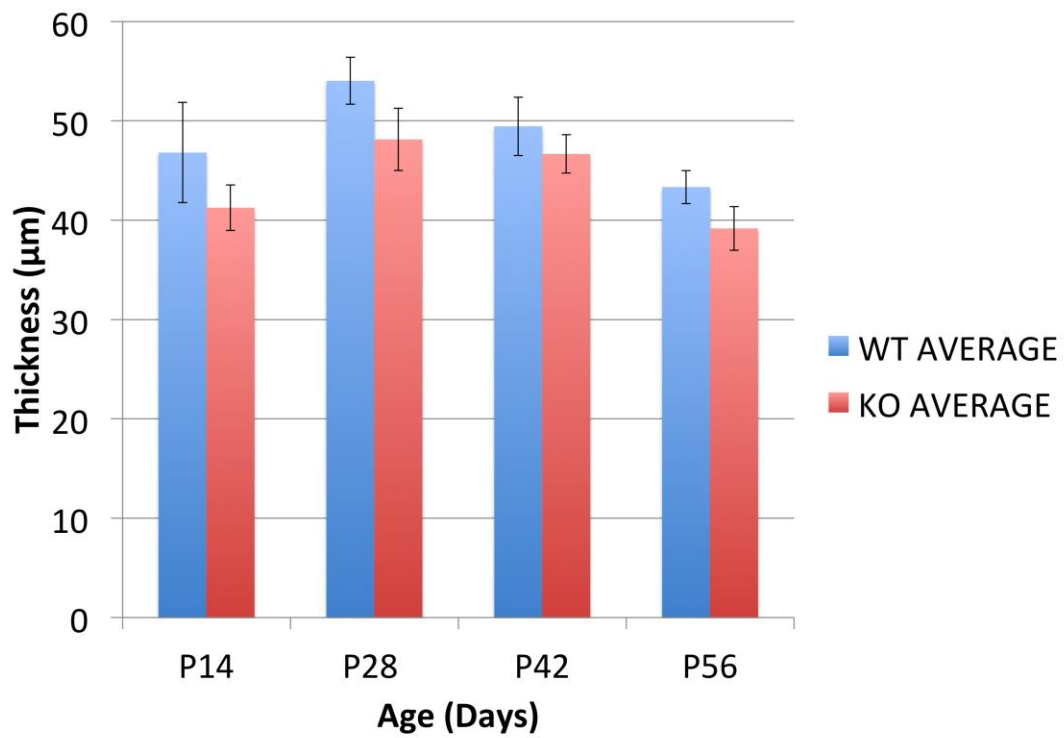

S1C

### Inner Nuclear Layer Thickness

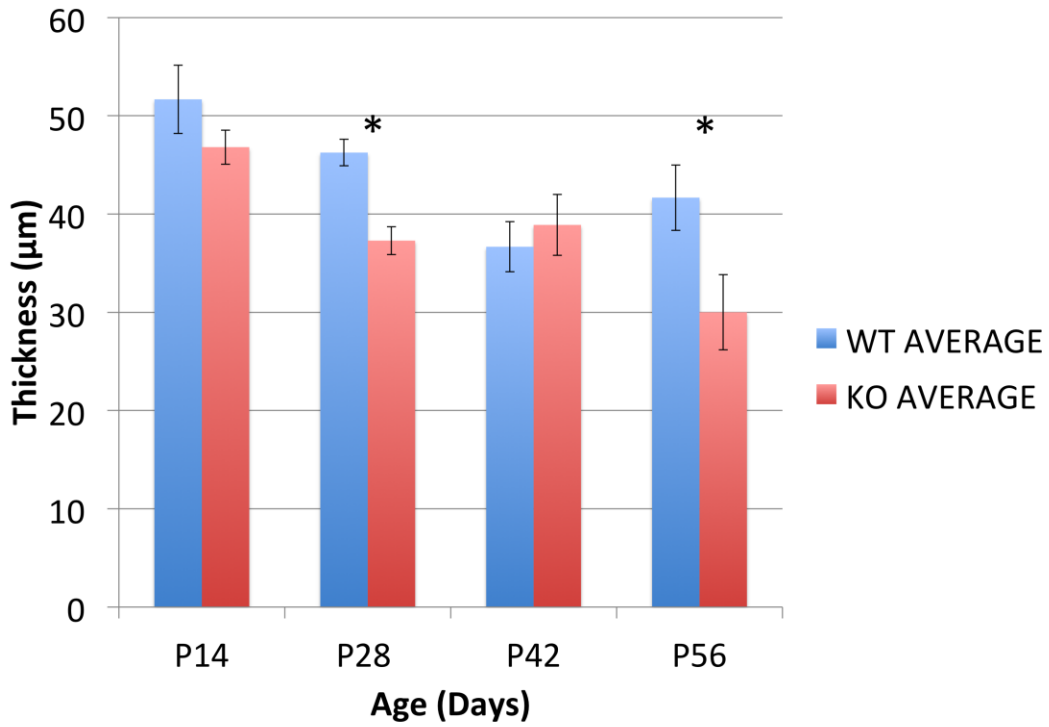

S1D

### Outer Plexiform Layer Thickness

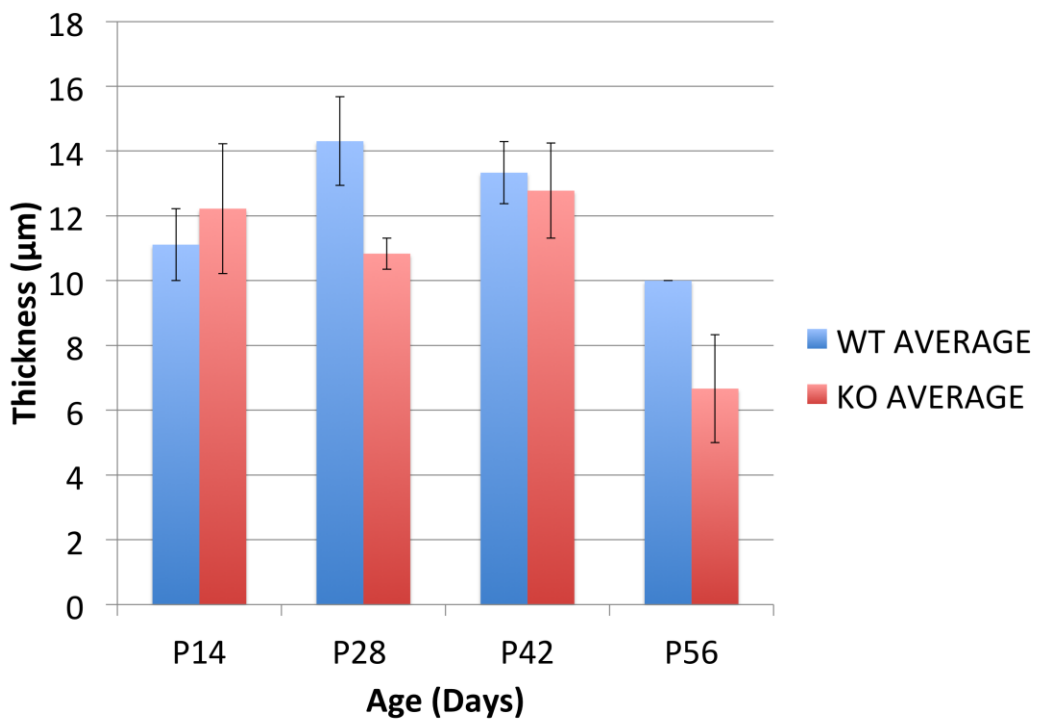

S1E

### Outer Nuclear Layer Thickness

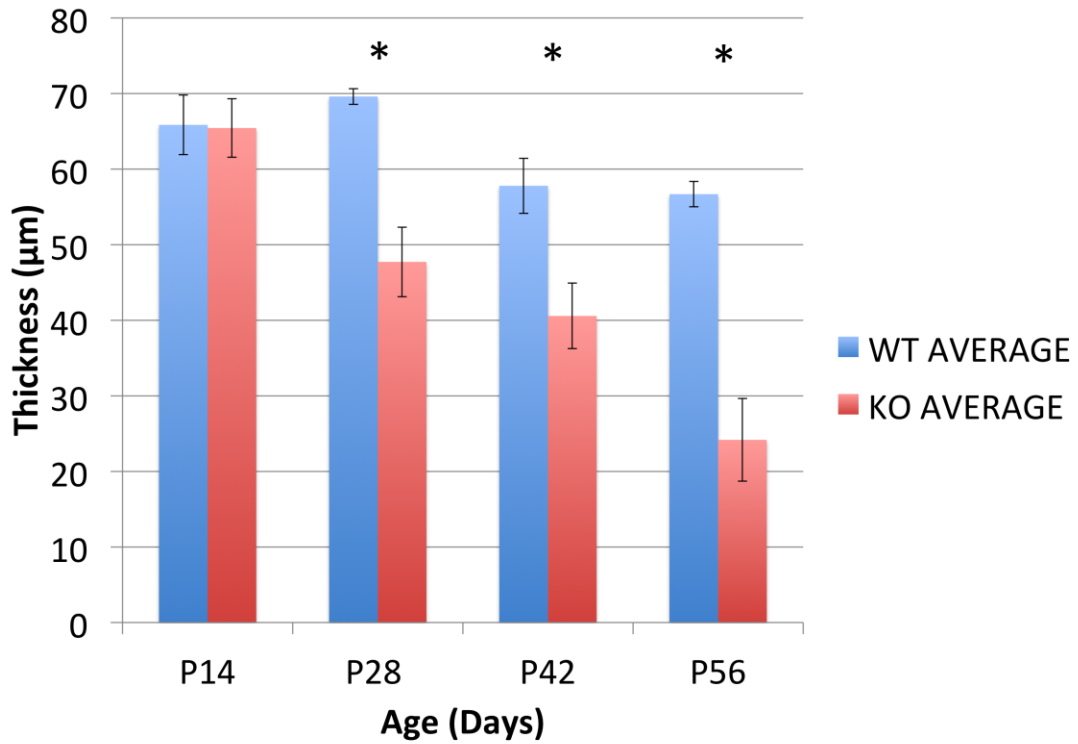

S1F

### Inner Segment / Outer Segment Thickness

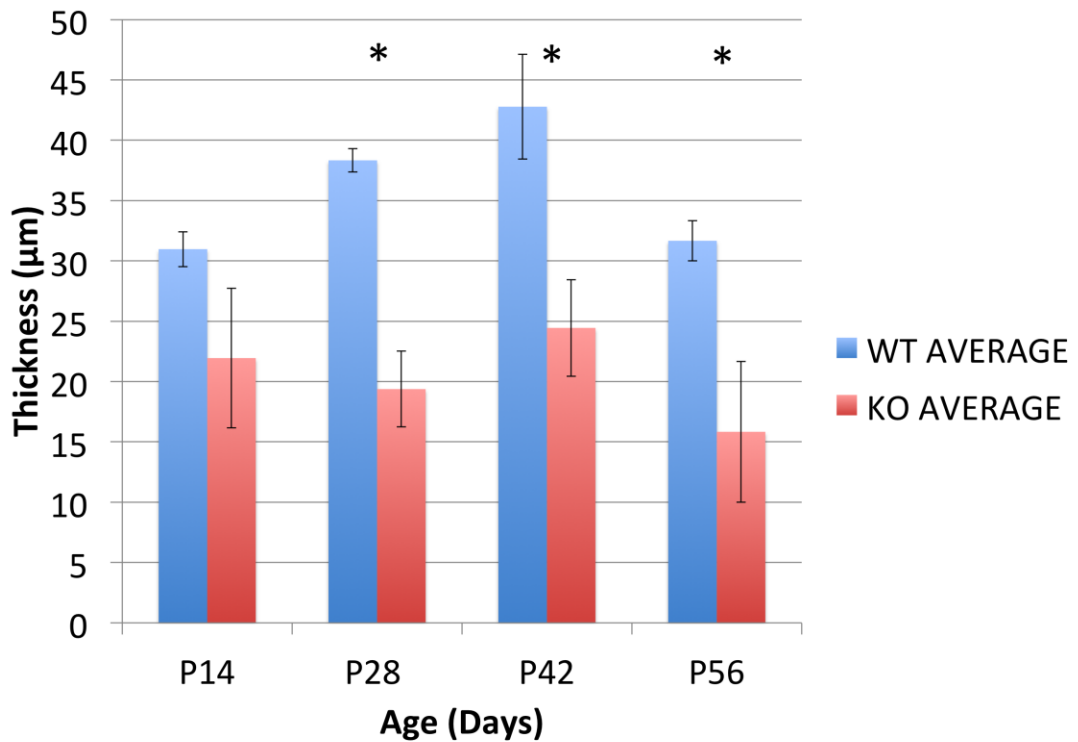

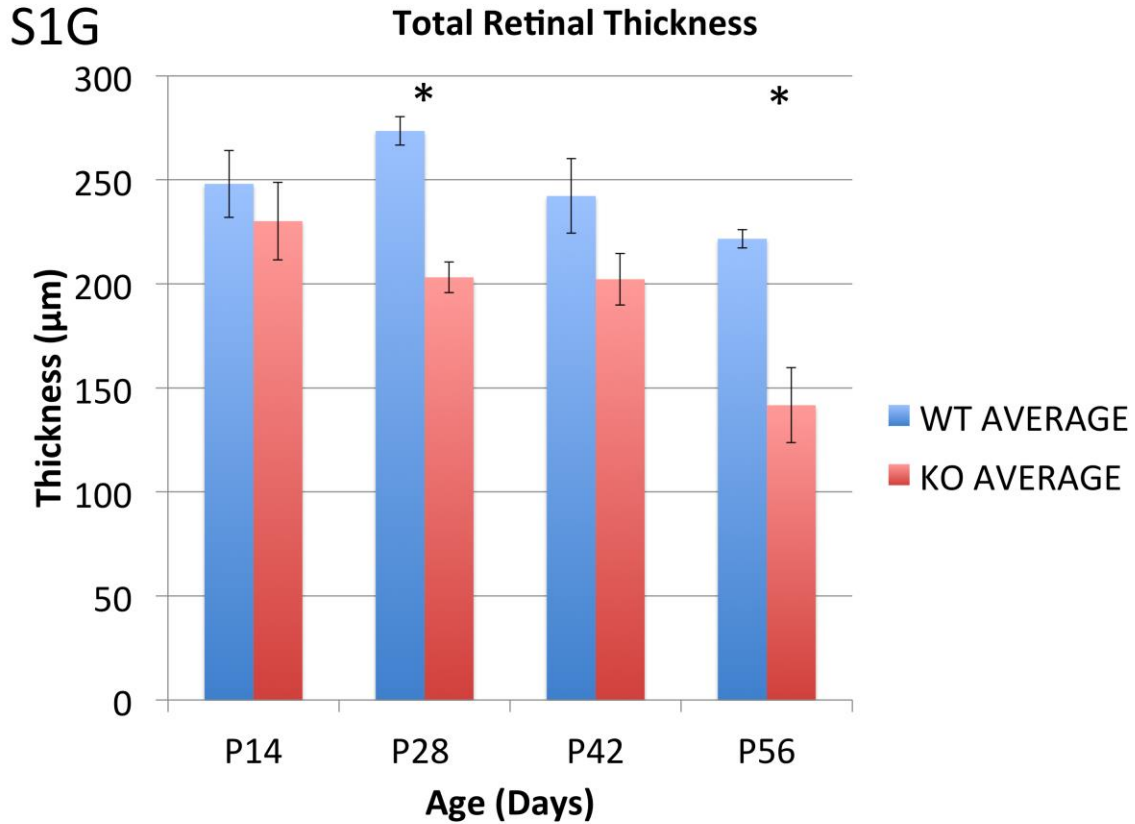

Supplemental Figure 1. The outer nuclear layer progressively degenerates in *Arap1*<sup>-/-</sup> mice. Systematic quantification of H & E sections of mouse retina from *Arap1*<sup>-/-</sup> mice shows development and preservation of most retinal layers (S1A-D), except for a marked progressive thinning of the photoreceptors in the outer nuclear layer (S1E) and a stationary shortening of their outer segments (S1F). The overall retinal thickness is equivalent at 2 weeks postnatal, but declines as the photoreceptors degenerate (S1G). At the later stages of the degeneration (8 weeks postnatal), there is thinning of the inner nuclear layer (S1C), which may be secondary to the primary photoreceptor loss. (n=3 each group, \*p < 0.05, error bars represent standard error)
